# Supplementary material for: COVID-19 and Influenza Coinfection Outcomes among Hospitalized Patients in the United States: A Propensity Matched Analysis of National Inpatient Sample
Source: MDPI journal article supplement (doi:10.3390/vaccines10122159), 2022-12-15

## Supplemental Files

| <b>Supplementary table:1</b>                                    |                                                                                                |
|-----------------------------------------------------------------|------------------------------------------------------------------------------------------------|
| <b>Variable</b>                                                 | <b>ICD-10 CM code</b>                                                                          |
| Influenza A & B                                                 | J10.XX, J11.XX, J09.XX                                                                         |
| Covid-19                                                        | U071, U00, U49, U50, U85, J1282                                                                |
| AKI                                                             | N17.XX, N99.0                                                                                  |
| Stroke                                                          | I63.XX, I60.XX, I61.XX, G43.6XX, I97.82XX, I97.81XX                                            |
| Cardiac arrest                                                  | I46.XX, I49.0XX, I97.12XX, I97.71XX                                                            |
| Smoking                                                         | F17.XX, Z87.891                                                                                |
| CAD                                                             | I25.10, I25.11, I25.118, I25.119, I252, I253, I25.4XX, I25.5, I25.6, I25.8XX, I25.7XX, I25.9XX |
| CHF, HTN, DM, Renal failure, Chronic pulmonary disease, Obesity | Elixhauser comorbidities were used                                                             |
| <b>Variable</b>                                                 | <b>ICD-10 procedure code</b>                                                                   |
| Intubation                                                      | 5A1945Z, 5A1955Z, 5A1935Z, 5A09357, 5A09457, 5A09557                                           |
| Vasopressor use                                                 | 3E030XZ, 3E033XZ, 3E040XZ, 3E043XZ, 3E050XZ, 3E053XZ, 3E060XZ, 3E063XZ                         |
| Hemodialysis                                                    | 5A1D70Z, 5A1D90Z, 5A1D80Z, 5A1D00Z, 5A1D60Z                                                    |

Supplemental Figure S1: Standardized bias across matched covariates.

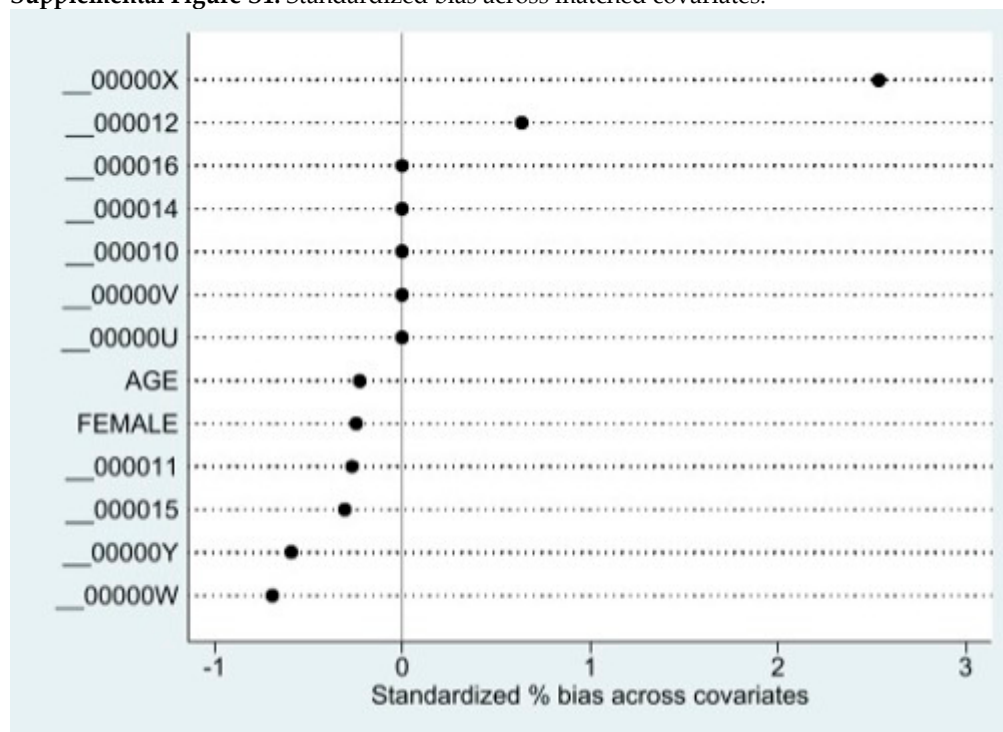

**Supplemental Figure S2:** Propensity score between Influenza positive and Influenza negative groups.

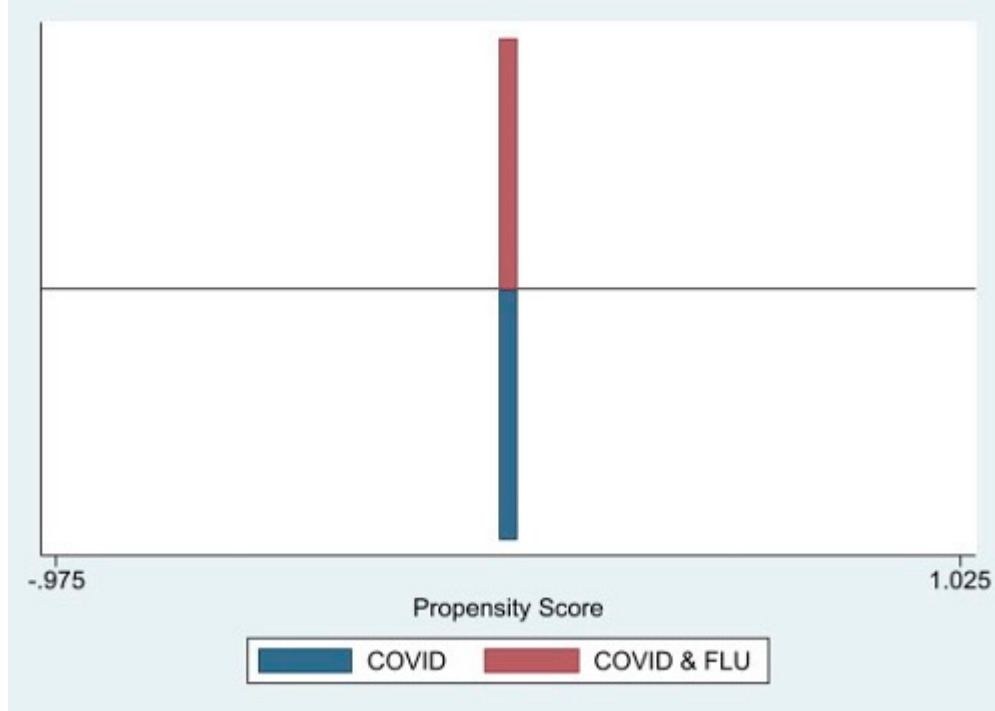

Supplement: s1 [file s1]
